# Supplementary material
Source: PubMed Central journal article supplement (PMC2824454)

**Supplementary Figure 2 Topology interpretation of AcMNPV polyhedrin structure.**

(A) The secondary structure was analyzed and assigned by dssp (Kabsch & Sander, 1983) and shown as arrows for strands and cylinder for helices. The disordered regions D1 and D2 are drawn as dashed lines. (B) shows sheet BIDG expanded by strands  $\beta A$ ,  $A'$  and  $A''$  and  $\beta J$  from two other subunits which are distinguished by colors.

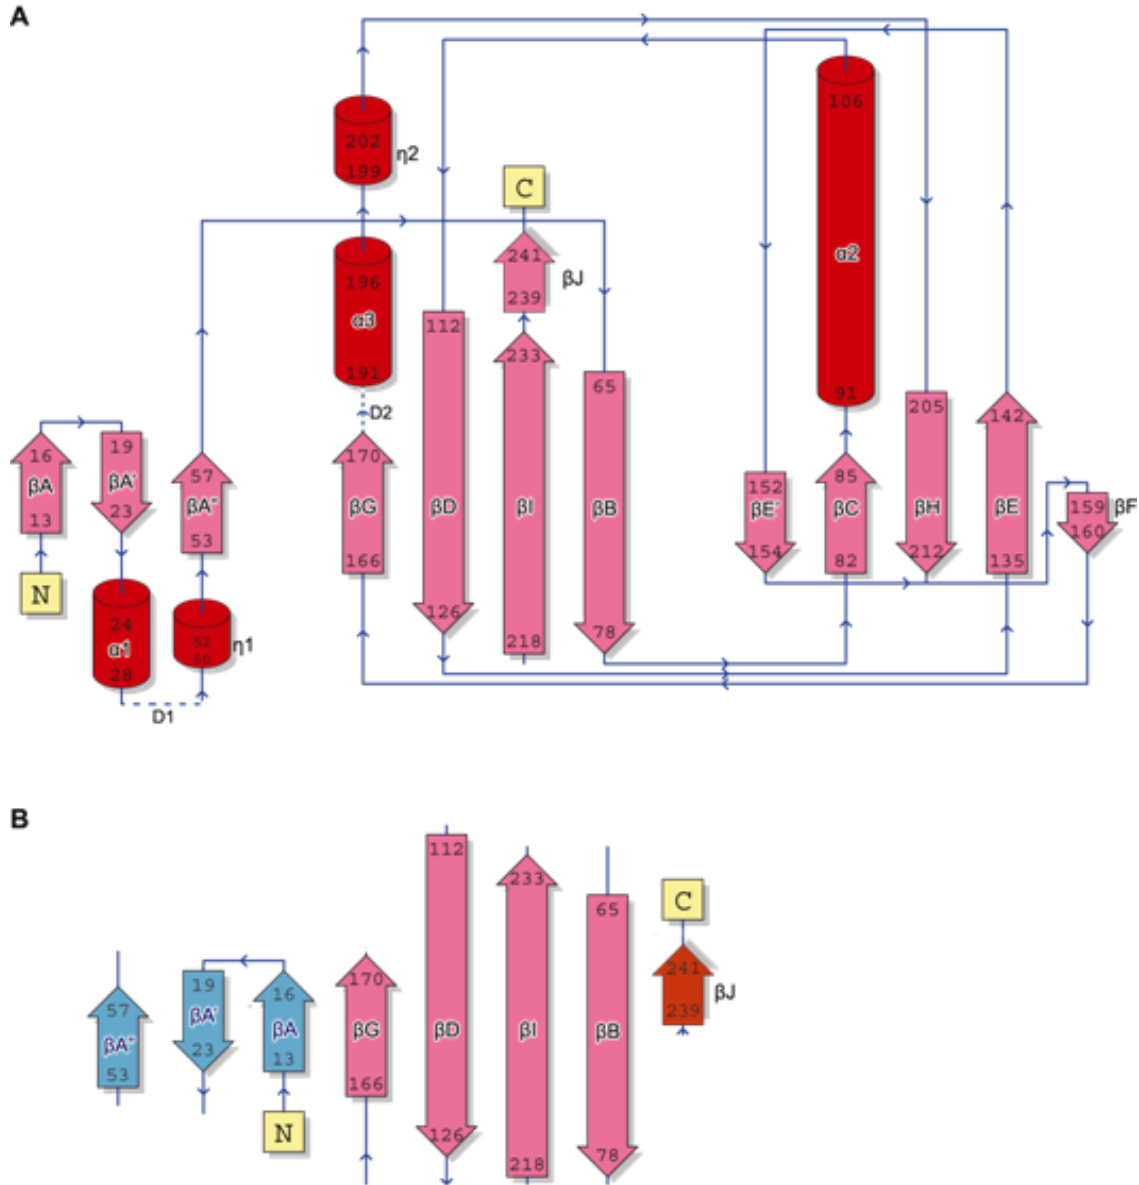

Supplement: emboj2009352s2.pdf [file emboj2009352s2.pdf]
