# Supplementary material
Source: PubMed Central journal article supplement (PMC2824454)
Supplement: emboj2009352s4.pdf [file emboj2009352s4.pdf]

### Supplementary Figure 4

Twelve feasible linkages for the assignment of N terminal portion of the molecule are drawn below around the 2-fold and 3-fold axes. C $\alpha$ s of interested residues are highlighted as colored spheres. Residue 31 of one subunit is marked as N and residues 49 of twelve subunits forming four trimers are named Cn. Distances between C $\alpha$  of N and each C are measured and tabulated. Unit cell and 3-fold axes are shown to facilitate viewing. Connection from N to C1 is considered to be the most likely choice.

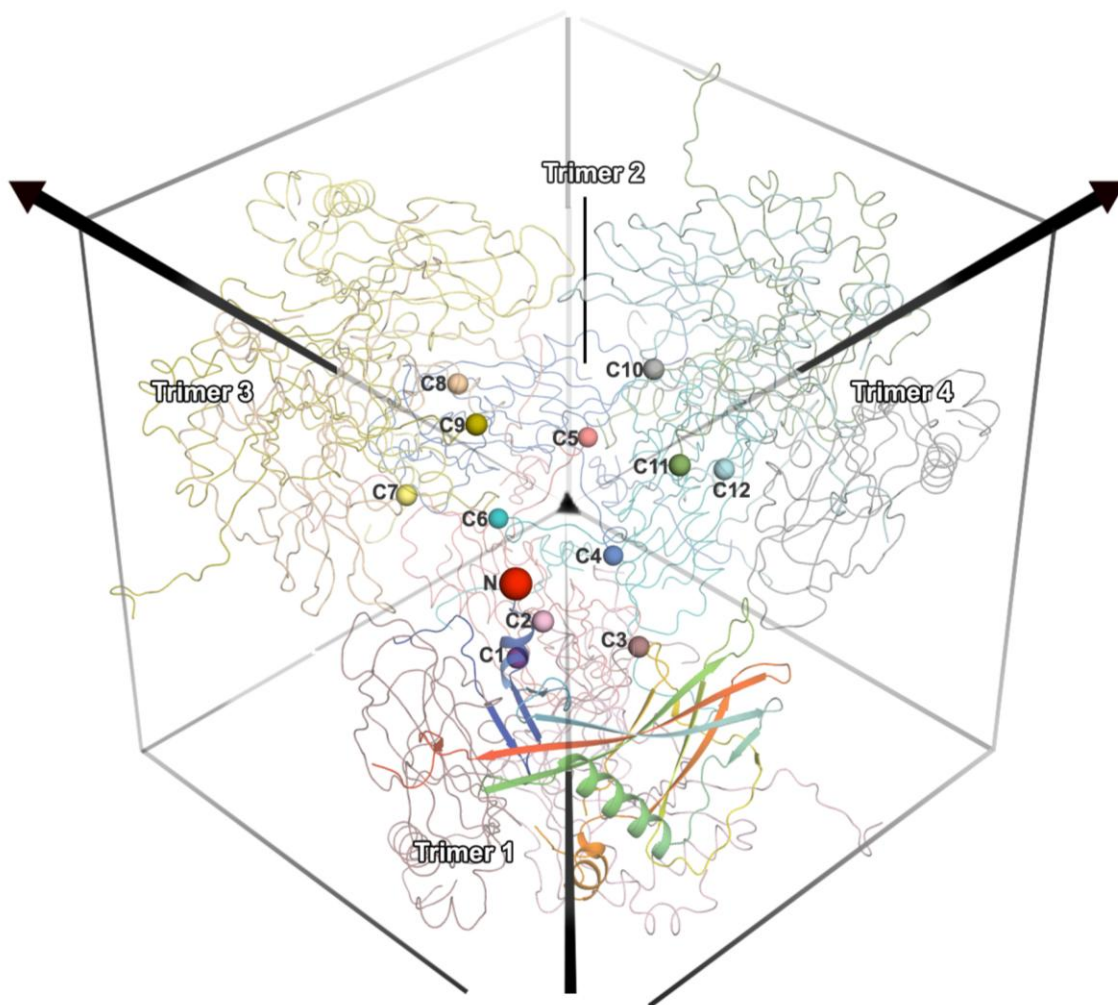

| Trimer 1 | Distance (Å) | Trimer 2 | Distance (Å) | Trimer 3 | Distance (Å) | Trimer 4 | Distance (Å) |
|----------|--------------|----------|--------------|----------|--------------|----------|--------------|
| C1       | 19.3         | C4       | 40.6         | C7       | 23.8         | C10      | 40.6         |
| C2       | 7.9          | C5       | 45.5         | C8       | 35.9         | C11      | 31.1         |
| C3       | 23.5         | C6       | 38.7         | C9       | 25.3         | C12      | 40.2         |
