# Supplementary material
Source: PubMed Central journal article supplement (PMC2824454)

## Supplementary Figure 5

Amino acids involved in different interactions mapped onto the surface of AcMNPV polyhedrin.

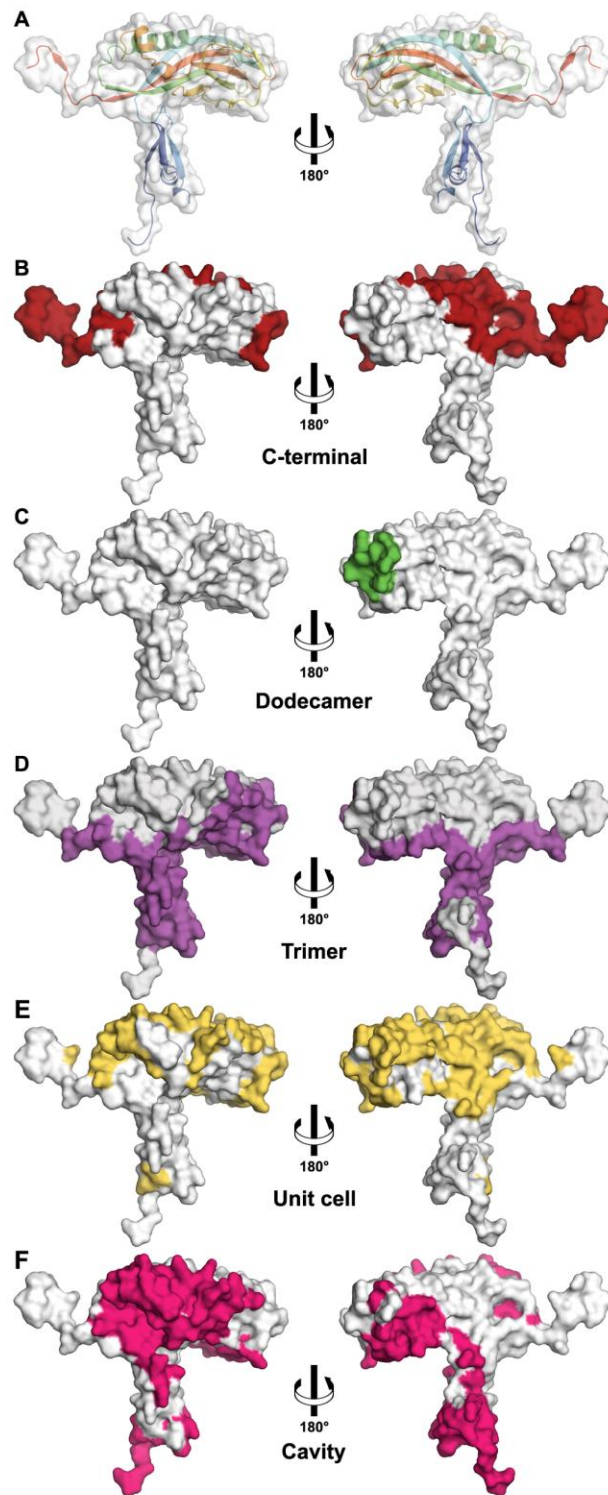

Supplement: emboj2009352s5.pdf [file emboj2009352s5.pdf]
