# Supplementary material
Source: PubMed Central journal article supplement (PMC2824454)

**Supplementary Figure 6 Cavities formed in the AcMNPV polyhedra around the center and corner points.**

The eight polyhedrin trimers in a unit cell are surface rendered and the image has been clipped to facilitate observation of the cavity. The surface is colored according to B-factors from blue with low values to red with high values. The clipping plane is blanked in grey. Part of the unit cell is drawn for orientation.

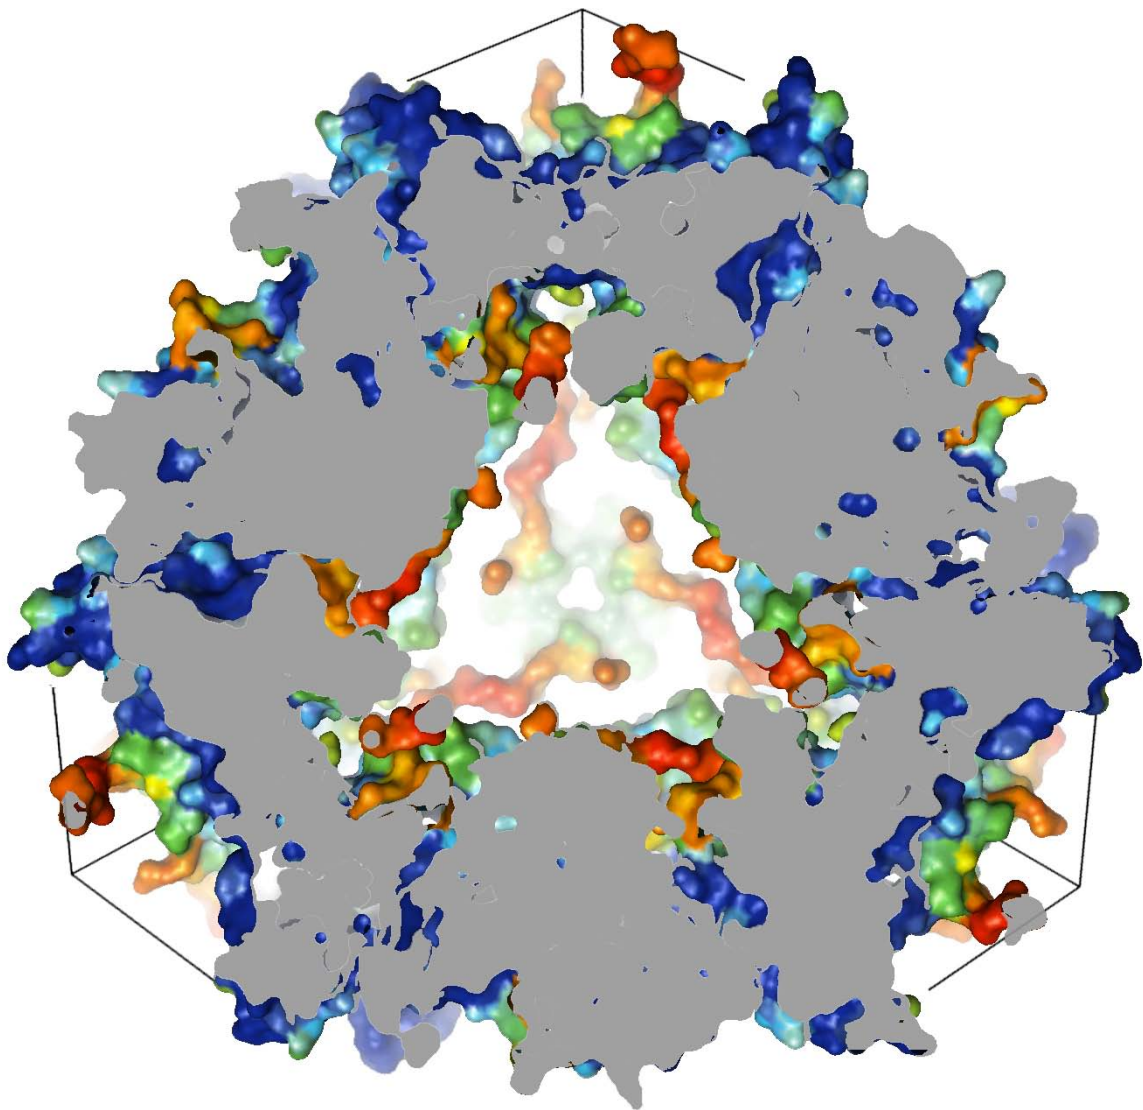

Supplement: emboj2009352s6.pdf [file emboj2009352s6.pdf]
