# Supplementary material
Source: PubMed Central journal article supplement (PMC2824454)

**Supplementary Figure 7 Tyrosines clustered at the trimer interface of baculovirus polyhedrin.**

The trimer is shown by cartoon representation and observed down the three fold axis. All tyrosines in the trimer are highlighted and shown as sticks.

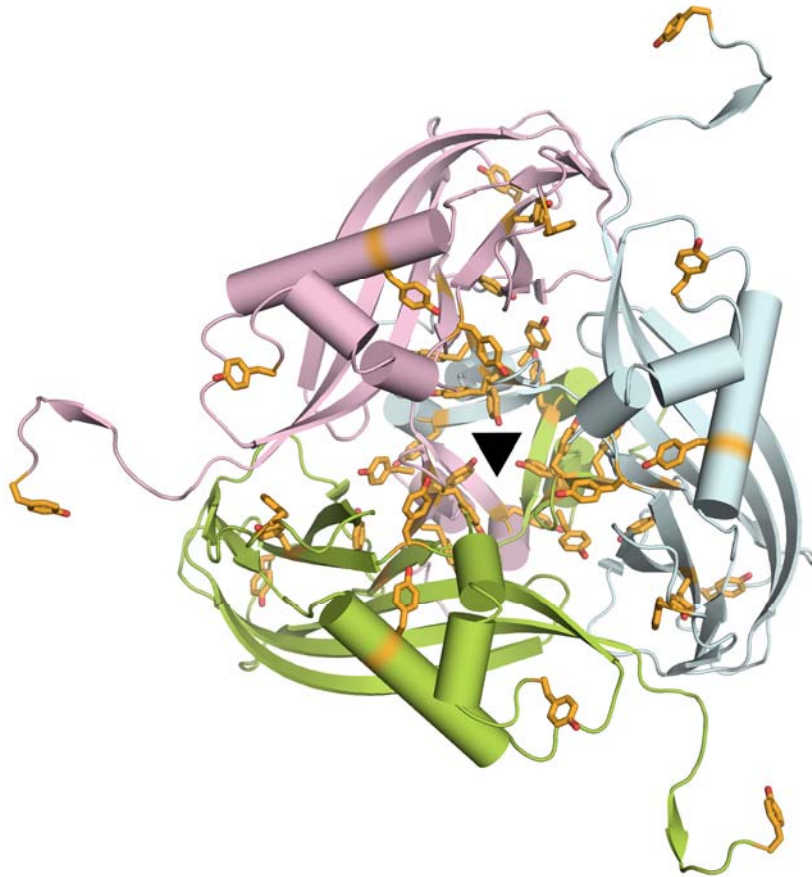

Supplement: emboj2009352s7.pdf [file emboj2009352s7.pdf]
