# Supplementary material
Source: PubMed Central journal article supplement (PMC2824454)
Supplement: emboj2009352s8.pdf [file emboj2009352s8.pdf]

**Supp. Table I Top hits of structure similarity search against baculovirus polyhedrin (DALI)**

| No | Chain  | Z-score | rmsd | Number of residues | Aligned length | Sequence identity (%) | Description                           |
|----|--------|---------|------|--------------------|----------------|-----------------------|---------------------------------------|
| 1  | 3epf-3 | 6.7     | 5.3  | 235                | 128            | 3                     | Poliovirus VP3                        |
| 2  | 1cov-3 | 6.6     | 5.9  | 238                | 131            | 7                     | Coxsackievirus B3 VP3                 |
| 3  | 3epc-3 | 6.6     | 5.4  | 235                | 129            | 7                     | Poliovirus VP3                        |
| 4  | 1d4m-3 | 6.5     | 5.9  | 238                | 132            | 6                     | Coxsackievirus A9 VP3                 |
| 5  | 1mec-3 | 6.5     | 3.9  | 231                | 122            | 7                     | Mengo Virus VP3                       |
| 6  | 1fjn-3 | 6.5     | 5.7  | 237                | 129            | 6                     | Rhino Virus VP3                       |
| 7  | 3epd-3 | 6.5     | 5.3  | 235                | 126            | 3                     | Poliovirus VP3                        |
| 8  | 1f2n-B | 6.5     | 5.8  | 189                | 117            | 5                     | Rice Yellow Mottle Virus coat protein |
| 9  | 1f2n-A | 6.5     | 5.8  | 189                | 118            | 5                     | Rice Yellow Mottle Virus coat protein |
| 10 | 1c8m-3 | 6.5     | 5.6  | 238                | 130            | 5                     | Human Coxsackievirus 16 VP3           |
| 11 | 1z7s-3 | 6.4     | 5.6  | 239                | 127            | 2                     | Human Coxsackievirus A21 VP3          |
| 12 | 1fmd-3 | 6.4     | 4.4  | 219                | 125            | 11                    | Foot-and-Mouth Disease Virus VP3      |
| 13 | 1f2n-C | 6.4     | 5.7  | 212                | 117            | 5                     | Rice Yellow Mottle Virus coat protein |
| 14 | 1z7z-3 | 6.4     | 3.8  | 192                | 122            | 3                     | Human Coxsackievirus A21              |
| 15 | 1b35-B | 6.3     | 4.3  | 255                | 123            | 10                    | Cricket Paralysis Virus, VP2          |
| 16 | 1qgc-3 | 6.3     | 3.8  | 219                | 120            | 12                    | Foot-and-Mouth Disease Virus VP3      |
| 17 | 2mev-3 | 6.3     | 4.2  | 231                | 121            | 7                     | Mengo Virus coat protein VP3          |
| 18 | 1opo-A | 6.3     | 5.0  | 267                | 123            | 7                     | Carnation Mottle Virus coat protein   |
|    | 2oh5   | 1.5     | 4.8  | 248                | 84             | 8                     | CPV1 polyhedrin                       |
